# Supplementary material for: Comprehensive investigation of temporal and autism-associated cell type composition-dependent and independent gene expression changes in human brains
Source: PubMed Central journal article supplement (PMC5482876; doi:10.1038/s41598-017-04356-7), 2017-06-23
Supplement: 41598_2017_4356_MOESM1_ESM.pdf [file 41598_2017_4356_MOESM1_ESM.pdf]

## **Supplementary materials**

# **Comprehensive investigation of temporal and autism-associated cell type composition-dependent and independent gene expression changes in human brains**

Qianhui Yu<sup>1,2</sup>, Zhisong He<sup>1\*</sup>

<sup>1</sup> CAS Key Laboratory of Computational Biology, CAS-MPG Partner Institute for Computational Biology (PICB), Shanghai Institutes for Biological Sciences (SIBS), Chinese Academy of Sciences (CAS), Shanghai, China

<sup>2</sup> University of Chinese Academy of Sciences, Beijing, China

### **Correspondence:**

Zhisong He

[zhisong.he@gmail.com](mailto:zhisong.he@gmail.com)

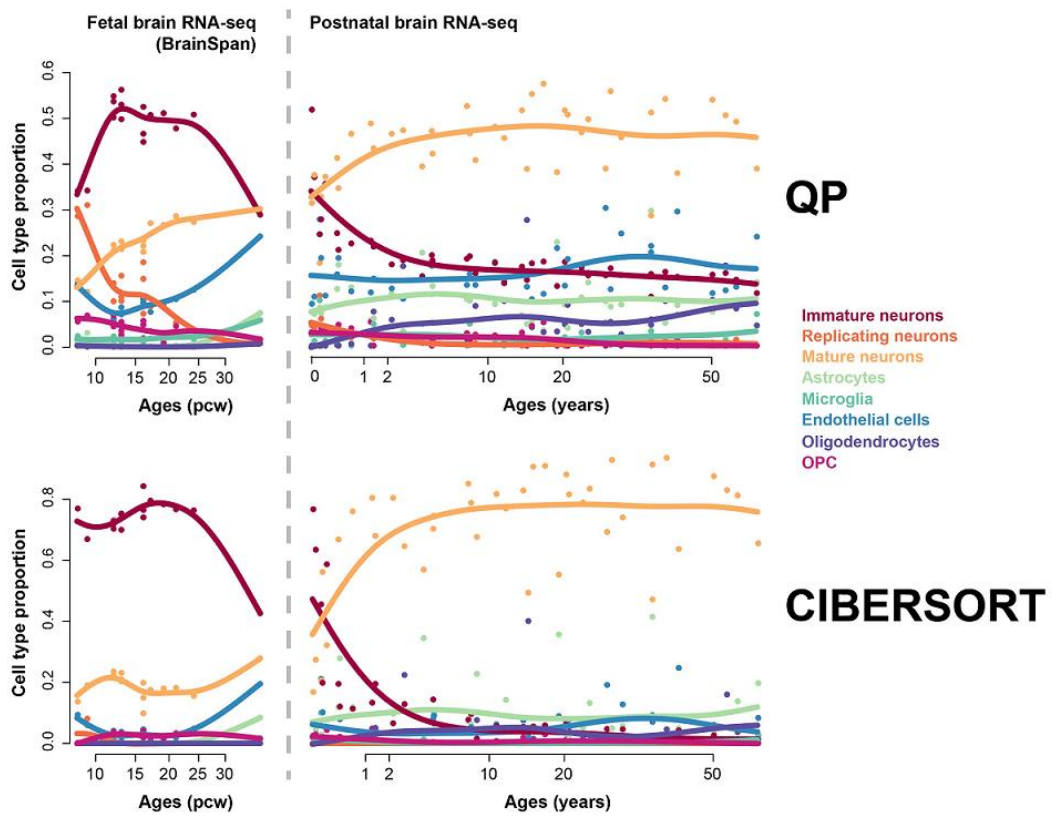

**Supplementary Figure 1.** The cell type compositions across lifespan in human brains, using QP (upper) and CIBERSORT (lower) algorithms. The dots show the estimated proportions of samples, and the curves show the spline interpolation results. The left panel shows the cell type compositions in human fetal brains, based on the human embryonic developmental brain RNA-seq data from BrainSpan; the right panel shows the cell type compositions in human postnatal brains, based on the human postnatal brain data set.

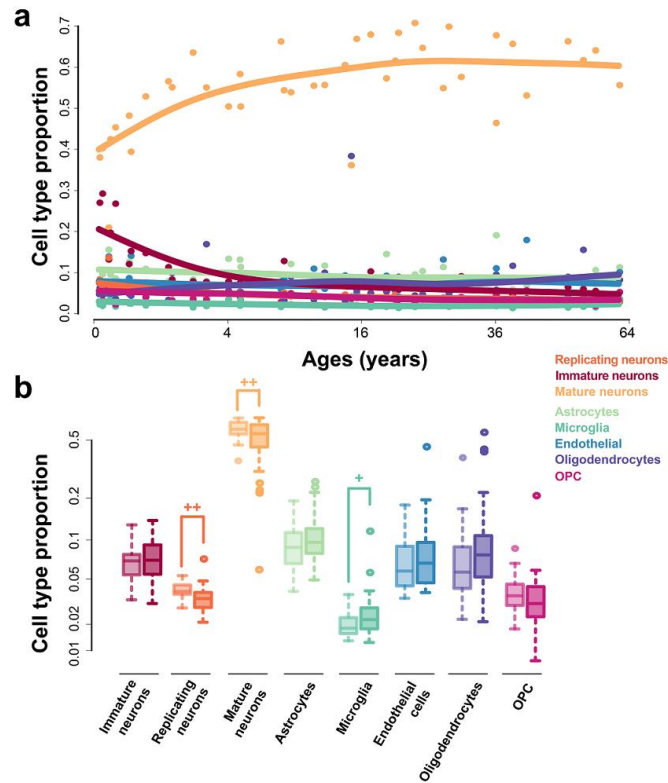

**Supplementary Figure 2.** Cell type compositions in human healthy and autistic brains, estimated using the DR-based deconvolution with confounding factor sensitive genes excluded. (a) The cell type compositions across lifespan in human brains. The dots show the estimated proportions of samples, and the curves show the spline interpolation results. (b) The estimated proportions of each cell types in ASD case samples and healthy control samples with ages at the same age range. Each pair of boxes with the same color show the proportions of one cell type, with the left box represents the proportions in healthy samples, and the right box represents the proportions in ASD samples. The plus signs mark significant difference according to Wilcoxon's test (+ –  $P < 0.1$ ; ++ –  $P < 0.05$ ).

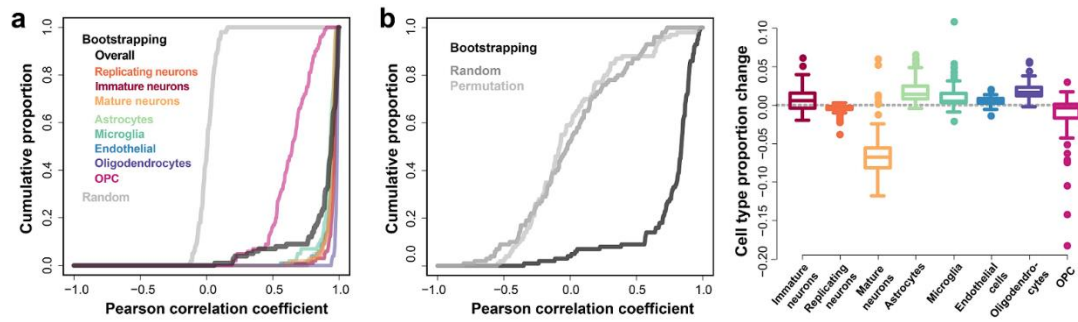

**Supplementary Figure 3.** Robustness of brain cell type composition temporal pattern and autistic brain composition alterations to individual cell variability. (a) The estimated cell type composition pattern is robust to cell variability of the single cell RNA-seq data. The curves show accumulative frequency distribution of Pearson correlation coefficient (PCC) between the reported pattern and patterns based on 100 bootstrapping of cells in Darmanis dataset. The black curve shows the robustness of the overall pattern, and curves with different colors represent the eight main cell types. The grey curve shows the correlations to random composition patterns. (b) The estimated cell type composition alterations in autism are robust to cell variability of the single cell RNA-seq data. In the left panel, the black curve shows accumulative frequency distribution of PCC between the average composition changes of the eight cell types based on the complete Darmanis dataset and changes estimated based on 100 bootstrapping of cells in Darmanis dataset. The darker grey curve shows PCC to normal distributed random changes. The lighter grey curve shows PCC to changes based on 100 permutation of cell types. In the right panel, the boxes show distributions of estimated proportion changes of the eight cell types in autistic case samples compared to healthy control based on 100 bootstrapping of cells in Darmanis dataset.

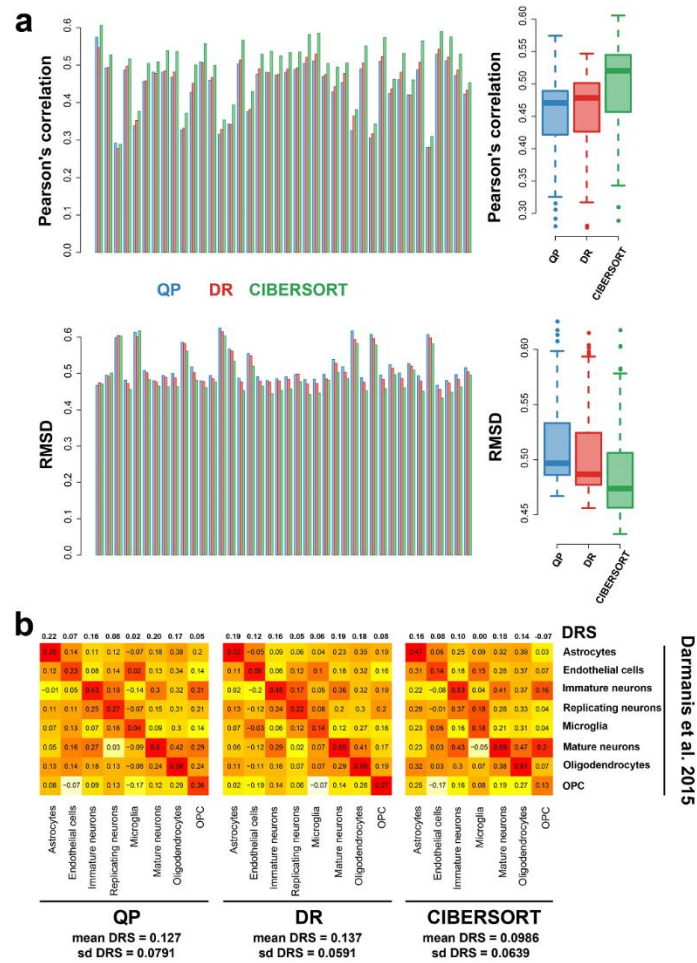

**Supplementary Figure 4.** Comparison of the three deconvolution algorithms: QP, DR and CIBERSORT. (a) Performance estimation using the similarity measurements, including the Pearson's correlation coefficient (PCC, upper) and root-mean-square deviation (RMSD, lower) between the observed bulk expression and the predicted bulk expression based on estimated cell type compositions. Colors of bars and boxes represent different algorithms. Each triple of bars in the left panel shows PCC and RMSD of each sample. Boxes in the right panel show PCC and RMSD across all samples. (b) Performance estimated based on the discrimination measurement, i.e. discriminating recovery score (DRS). The heatmaps show PCC between the re-estimated cell type transcriptome (columns) and the measured cell type transcriptome by Darmanis et al. 2015<sup>21</sup> (rows). Each of the three heatmaps represents the results based on QP-based (left), DR-based (middle) and CIBERSORT-based (right) composition patterns, respectively. Numbers in the heatmaps show the PCC, with colors representing the relative PCCs in each column. The DRS of each cell type is shown above each column of the heatmaps, with the mean DRSs with the standard deviations shown at the bottom.

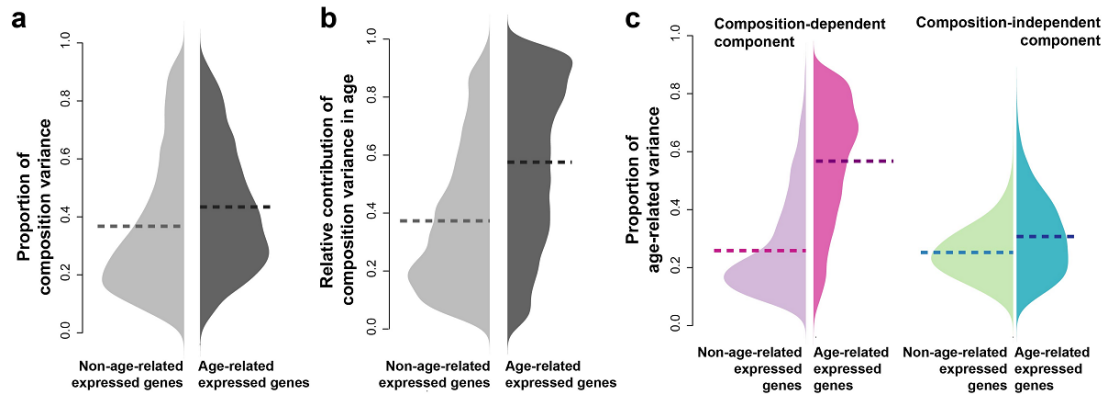

**Supplementary Figure 5.** The impact of cell type composition changes in age-related expressions, based on CIBERSORT-based composition patterns. (a) The proportions of gene expression variance explained by cell type composition (composition-related variance) in the human postnatal brain data set. Light grey – genes without age-related expression; dark grey – genes with age-related expression. The horizontal dash lines show the mean proportion of composition-related variance. (b) The relative contribution of the composition-dependent component to the variance explained by age (age-explained variance), measured as ratio of age-explained variance in the composition-dependent component to the sum of age-explained variance in both components. Light grey – genes without age-related expression; dark grey – genes with age-related expression. The horizontal dash lines show the mean proportion of composition-related variance. (c) The proportion of variance explained by ages (age-explained variance) in each of the two components of expression: pink – the composition-dependent component; green – the composition-independent component. The light colors represent the proportions of age-related variance in genes without age-related expression changes; the dark colors represent the proportions of age-related variance in genes with age-related expression changes. The horizontal dash lines show the means of age-related variance proportions.

### Postnatal development

|           |        | DR  |      |     |        |       |
|-----------|--------|-----|------|-----|--------|-------|
|           |        | G1  | G2   | G3  | Others | Total |
| CIBERSORT | G1     | 400 | 177  | 33  | 4      | 614   |
|           | G2     | 408 | 5686 | 37  | 246    | 6377  |
|           | G3     | 56  | 49   | 256 | 154    | 515   |
|           | Others | 29  | 1351 | 236 | 3855   | 5471  |
|           | Total  | 893 | 7263 | 562 | 4259   |       |

### ASD alteration

|           |                            | DR                      |                            |        |       |
|-----------|----------------------------|-------------------------|----------------------------|--------|-------|
|           |                            | Composition-independent | Composition-dependent only | Others | Total |
| CIBERSORT | Composition-independent    | 229                     | 39                         | 7      | 275   |
|           | Composition-dependent only | 351                     | 6824                       | 647    | 7822  |
|           | Others                     | 64                      | 2937                       | 2934   | 5935  |
|           | Total                      | 644                     | 9800                       | 3588   |       |

**Supplementary Figure 6.** DR and CIBERSORT based cell type composition patterns resulted in consistent classification of genes with composition-dependent and/or composition-independent component showing (a) age-related changes in postnatal human brains and (b) ASD alteration. The red shadows indicate significant overlap (hypergeometric test,  $P < 0.0001$ ).

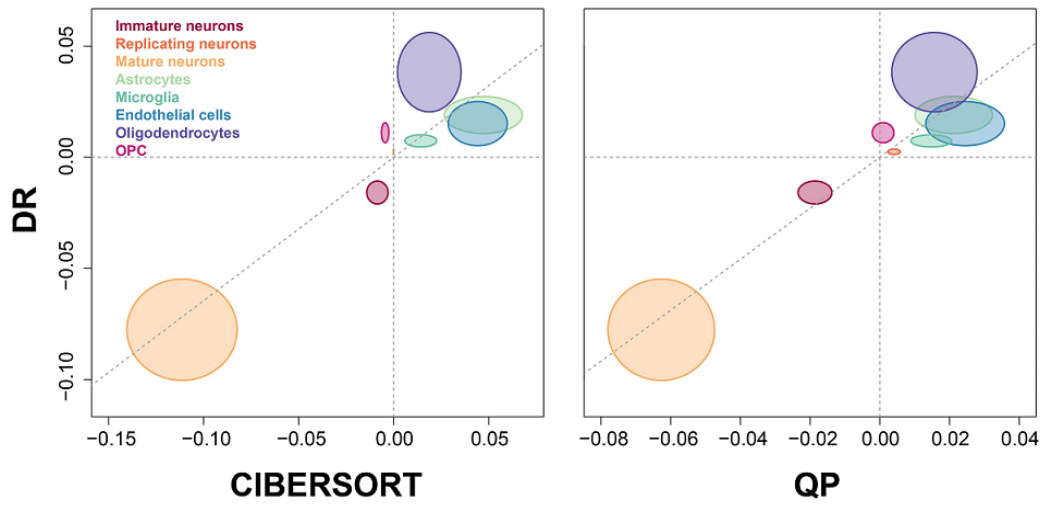

**Supplementary Figure 7.** Three deconvolution algorithms provide similar estimations of cell type composition alterations in ASD samples. Different ellipses represent the eight cell types. The center of each ellipse shows the average altered proportion of each cell type in ASD samples comparing to the healthy samples, based on the DR-based composition patterns (y-axis) or CIBERSORT (left panel) / QP (right panel) (x-axis) based composition patterns. The major and minor radius of each ellipse is proportional to the standard deviation of the alteration based on the corresponding algorithm.



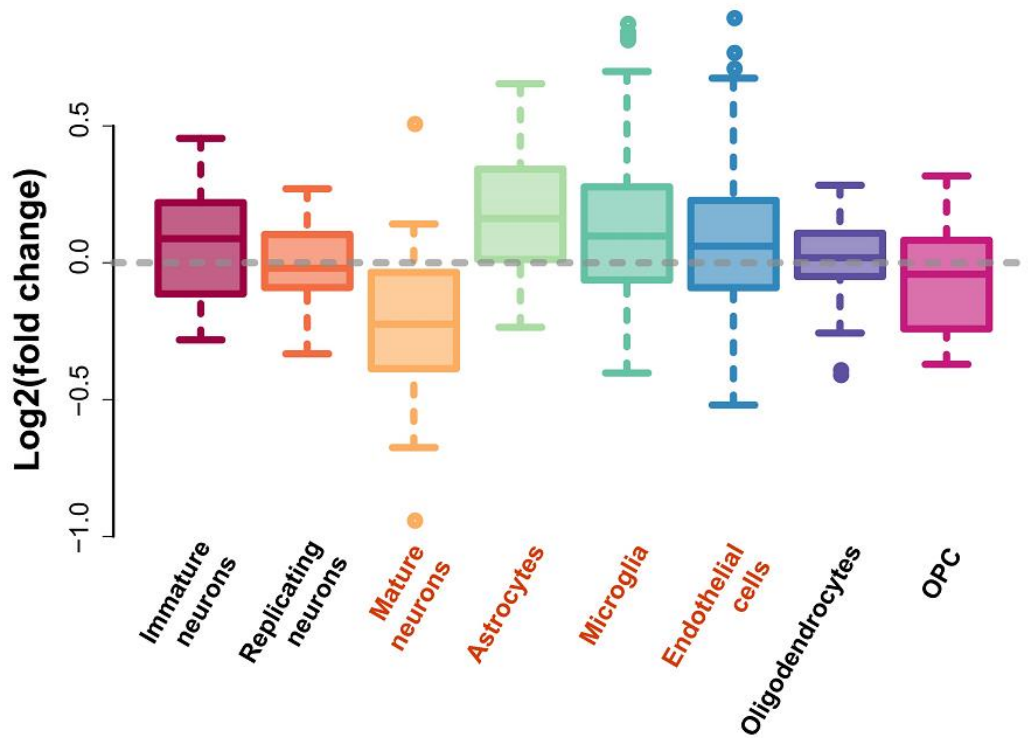

**Supplementary Figure 8.** Expression level alterations of cell type signature genes in autism samples, based on the Voineagu dataset. Each box shows the log<sub>2</sub>-transformed fold change of cell type signature genes for one cell type, between average expression levels in autistic samples and healthy samples. Labels of cell types whose signature genes show significant expression changes (Wilcoxon's test, BH corrected  $P < 0.05$ ) are marked in red.

**Supplementary Table S1.** Functional enrichment (DAVID) of each of the three groups of age-related changed genes, sorted in ascending order of Benjamini corrected *P* value. Only the functional terms with Benjamini corrected *P*<0.1 are shown.

**G1 (Dependent+ Independent +)**

| Category         | Term                                                                           | Count | %     | PValue   | List Total | Pop Hits | Pop Total | Fold Enrichment | Bonferroni | Benjamini | FDR    |
|------------------|--------------------------------------------------------------------------------|-------|-------|----------|------------|----------|-----------|-----------------|------------|-----------|--------|
| UP_KEYWORDS      | Cell membrane                                                                  | 161   | 19.24 | 5.10E-07 | 834        | 1582     | 11870     | 1.448           | 0.0002     | 0.0002    | 0.0007 |
| GOTERM_BP_DIRECT | GO:0006414~translational elongation                                            | 21    | 2.51  | 1.66E-07 | 730        | 76       | 10388     | 3.932           | 0.0004     | 0.0004    | 0.0003 |
| UP_KEYWORDS      | Synapse                                                                        | 40    | 4.78  | 1.13E-05 | 834        | 269      | 11870     | 2.116           | 0.0047     | 0.0016    | 0.0158 |
| UP_KEYWORDS      | Cell junction                                                                  | 61    | 7.29  | 9.40E-06 | 834        | 483      | 11870     | 1.797           | 0.0040     | 0.0020    | 0.0132 |
| GOTERM_CC_DIRECT | GO:0030425~dendrite                                                            | 37    | 4.42  | 1.65E-05 | 770        | 245      | 10996     | 2.157           | 0.0071     | 0.0071    | 0.0232 |
| GOTERM_CC_DIRECT | GO:0030054~cell junction                                                       | 45    | 5.38  | 4.74E-05 | 770        | 339      | 10996     | 1.896           | 0.0204     | 0.0103    | 0.0669 |
| GOTERM_BP_DIRECT | GO:0016259~selenocysteine metabolic process                                    | 17    | 2.03  | 2.02E-05 | 730        | 70       | 10388     | 3.456           | 0.0503     | 0.0128    | 0.0358 |
| GOTERM_BP_DIRECT | GO:0006614~SRP-dependent cotranslational protein targeting to membrane         | 19    | 2.27  | 3.15E-05 | 730        | 88       | 10388     | 3.072           | 0.0772     | 0.0133    | 0.0556 |
| GOTERM_BP_DIRECT | GO:0006413~translational initiation                                            | 22    | 2.63  | 1.60E-05 | 730        | 108      | 10388     | 2.899           | 0.0401     | 0.0135    | 0.0283 |
| GOTERM_BP_DIRECT | GO:0006415~translational termination                                           | 17    | 2.03  | 1.12E-05 | 730        | 67       | 10388     | 3.611           | 0.0281     | 0.0142    | 0.0198 |
| GOTERM_BP_DIRECT | GO:0000184~nuclear-transcribed mRNA catabolic process, nonsense-mediated decay | 20    | 2.39  | 3.11E-05 | 730        | 96       | 10388     | 2.965           | 0.0762     | 0.0157    | 0.0549 |
| UP_KEYWORDS      | Calcium                                                                        | 60    | 7.17  | 1.87E-04 | 834        | 524      | 11870     | 1.630           | 0.0759     | 0.0195    | 0.2625 |
| GOTERM_BP_DIRECT | GO:0019083~viral transcription                                                 | 19    | 2.27  | 5.86E-05 | 730        | 92       | 10388     | 2.939           | 0.1389     | 0.0211    | 0.1035 |
| GOTERM_BP_DIRECT | GO:0007268~synaptic transmission                                               | 38    | 4.54  | 8.00E-05 | 730        | 273      | 10388     | 1.981           | 0.1846     | 0.0252    | 0.1413 |

|                  |                                                         |    |      |          |     |     |       |       |        |        |        |
|------------------|---------------------------------------------------------|----|------|----------|-----|-----|-------|-------|--------|--------|--------|
| GOTERM_BP_DIRECT | GO:0006412~translation                                  | 32 | 3.82 | 1.59E-04 | 730 | 221 | 10388 | 2.060 | 0.3338 | 0.0398 | 0.2810 |
| GOTERM_BP_DIRECT | GO:0001887~selenium compound metabolic process          | 18 | 2.15 | 1.47E-04 | 730 | 90  | 10388 | 2.846 | 0.3131 | 0.0409 | 0.2599 |
| GOTERM_CC_DIRECT | GO:0022625~cytosolic large ribosomal subunit            | 12 | 1.43 | 3.76E-04 | 770 | 48  | 10996 | 3.570 | 0.1509 | 0.0531 | 0.5297 |
| GOTERM_MF_DIRECT | GO:0004683~calmodulin-dependent protein kinase activity | 8  | 0.96 | 7.75E-05 | 722 | 17  | 10423 | 6.794 | 0.0582 | 0.0582 | 0.1184 |
| UP_KEYWORDS      | Postsynaptic cell membrane                              | 20 | 2.39 | 9.04E-04 | 834 | 123 | 11870 | 2.314 | 0.3172 | 0.0735 | 1.2631 |
| GOTERM_CC_DIRECT | GO:0045211~postsynaptic membrane                        | 23 | 2.75 | 8.67E-04 | 770 | 152 | 10996 | 2.161 | 0.3142 | 0.0900 | 1.2165 |
| UP_KEYWORDS      | Potassium transport                                     | 13 | 1.55 | 0.00145  | 834 | 64  | 11870 | 2.891 | 0.4589 | 0.0973 | 2.0251 |

## G2 (Dependent+ Independent-)

| Category       | Term                              | Count | %       | PValue   | List Total | Pop Hits | Pop Total | Fold Enrichment | Bonferroni | Benjamini | FDR    |
|----------------|-----------------------------------|-------|---------|----------|------------|----------|-----------|-----------------|------------|-----------|--------|
| UP_KEYWORDS    | Zinc-finger                       | 900   | 13.5849 | 4.43E-28 | 6594       | 1293     | 11870     | 1.2530          | 0.0000     | 0.0000    | 0.0000 |
| UP_KEYWORDS    | Nucleus                           | 2277  | 34.3698 | 1.58E-22 | 6594       | 3667     | 11870     | 1.1178          | 0.0000     | 0.0000    | 0.0000 |
| INTERPRO       | IPR001909:Krueppel-associated box | 225   | 3.39623 | 2.04E-23 | 6228       | 267      | 11196     | 1.5149          | 0.0000     | 0.0000    | 0.0000 |
| SMART          | SM00349:SM00349                   | 225   | 3.39623 | 2.37E-22 | 3429       | 266      | 6011      | 1.4828          | 0.0000     | 0.0000    | 0.0000 |
| UP_SEQ_FEATURE | domain:KRAB                       | 214   | 3.23019 | 6.46E-22 | 6533       | 255      | 11760     | 1.5107          | 0.0000     | 0.0000    | 0.0000 |
| UP_KEYWORDS    | Zinc                              | 1062  | 16.0302 | 6.39E-18 | 6594       | 1629     | 11870     | 1.1736          | 0.0000     | 0.0000    | 0.0000 |
| UP_SEQ_FEATURE | zinc finger region:C2H2-type 9    | 232   | 3.50189 | 3.93E-18 | 6533       | 291      | 11760     | 1.4351          | 0.0000     | 0.0000    | 0.0000 |
| INTERPRO       | IPR015880:Zinc finger, C2H2-like  | 427   | 6.44528 | 6.69E-18 | 6228       | 590      | 11196     | 1.3010          | 0.0000     | 0.0000    | 0.0000 |
| UP_SEQ_FEATURE | zinc finger region:C2H2-type 6    | 288   | 4.34717 | 2.48E-18 | 6533       | 374      | 11760     | 1.3862          | 0.0000     | 0.0000    | 0.0000 |
| UP_SEQ_FEATURE | zinc finger region:C2H2-type 7    | 269   | 4.06038 | 3.73E-18 | 6533       | 346      | 11760     | 1.3995          | 0.0000     | 0.0000    | 0.0000 |

|                  |                                                              |      |         |          |      |      |       |        |        |        |        |
|------------------|--------------------------------------------------------------|------|---------|----------|------|------|-------|--------|--------|--------|--------|
| INTERPRO         | IPR007087:Zinc finger, C2H2                                  | 410  | 6.18868 | 5.67E-18 | 6228 | 563  | 11196 | 1.3092 | 0.0000 | 0.0000 | 0.0000 |
| INTERPRO         | IPR013087:Zinc finger C2H2-type/integrase DNA-binding domain | 361  | 5.44906 | 1.95E-17 | 6228 | 489  | 11196 | 1.3271 | 0.0000 | 0.0000 | 0.0000 |
| UP_SEQ_FEATURE   | zinc finger region:C2H2-type 10                              | 211  | 3.18491 | 3.88E-17 | 6533 | 263  | 11760 | 1.4442 | 0.0000 | 0.0000 | 0.0000 |
| UP_SEQ_FEATURE   | zinc finger region:C2H2-type 3                               | 337  | 5.08679 | 5.22E-17 | 6533 | 454  | 11760 | 1.3362 | 0.0000 | 0.0000 | 0.0000 |
| SMART            | SM00355:SM00355                                              | 427  | 6.44528 | 8.96E-16 | 3429 | 590  | 6011  | 1.2687 | 0.0000 | 0.0000 | 0.0000 |
| UP_SEQ_FEATURE   | zinc finger region:C2H2-type 8                               | 250  | 3.77358 | 2.74E-16 | 6533 | 323  | 11760 | 1.3933 | 0.0000 | 0.0000 | 0.0000 |
| UP_SEQ_FEATURE   | zinc finger region:C2H2-type 5                               | 309  | 4.66415 | 2.12E-16 | 6533 | 412  | 11760 | 1.3501 | 0.0000 | 0.0000 | 0.0000 |
| GOTERM_MF_DIRECT | GO:0003677~DNA binding                                       | 672  | 10.1434 | 1.87E-16 | 5820 | 987  | 10423 | 1.2193 | 0.0000 | 0.0000 | 0.0000 |
| UP_SEQ_FEATURE   | zinc finger region:C2H2-type 4                               | 317  | 4.78491 | 7.86E-16 | 6533 | 427  | 11760 | 1.3364 | 0.0000 | 0.0000 | 0.0000 |
| UP_SEQ_FEATURE   | zinc finger region:C2H2-type 2                               | 323  | 4.87547 | 5.79E-15 | 6533 | 440  | 11760 | 1.3214 | 0.0000 | 0.0000 | 0.0000 |
| UP_SEQ_FEATURE   | zinc finger region:C2H2-type 11                              | 186  | 2.80755 | 1.17E-14 | 6533 | 233  | 11760 | 1.4370 | 0.0000 | 0.0000 | 0.0000 |
| GOTERM_CC_DIRECT | GO:0005634~nucleus                                           | 2152 | 32.483  | 1.47E-14 | 6088 | 3551 | 10996 | 1.0946 | 0.0000 | 0.0000 | 0.0000 |
| GOTERM_BP_DIRECT | GO:0006351~transcription, DNA-templated                      | 831  | 12.5434 | 2.71E-15 | 5744 | 1268 | 10388 | 1.1852 | 0.0000 | 0.0000 | 0.0000 |
| UP_KEYWORDS      | DNA-binding                                                  | 817  | 12.3321 | 6.02E-13 | 6594 | 1257 | 11870 | 1.1700 | 0.0000 | 0.0000 | 0.0000 |
| UP_SEQ_FEATURE   | zinc finger region:C2H2-type 1                               | 289  | 4.36226 | 2.10E-13 | 6533 | 394  | 11760 | 1.3204 | 0.0000 | 0.0000 | 0.0000 |
| GOTERM_BP_DIRECT | GO:0006355~regulation of transcription, DNA-templated        | 585  | 8.83019 | 1.01E-13 | 5744 | 871  | 10388 | 1.2147 | 0.0000 | 0.0000 | 0.0000 |
| UP_SEQ_FEATURE   | zinc finger region:C2H2-type 12                              | 161  | 2.43019 | 4.96E-13 | 6533 | 201  | 11760 | 1.4419 | 0.0000 | 0.0000 | 0.0000 |
| UP_SEQ_FEATURE   | zinc finger region:C2H2-type 13                              | 132  | 1.99245 | 1.38E-12 | 6533 | 160  | 11760 | 1.4851 | 0.0000 | 0.0000 | 0.0000 |
| UP_KEYWORDS      | Transcription regulation                                     | 990  | 14.9434 | 1.46E-11 | 6594 | 1562 | 11870 | 1.1409 | 0.0000 | 0.0000 | 0.0000 |
| UP_KEYWORDS      | Transcription                                                | 1024 | 15.4566 | 1.23E-11 | 6594 | 1619 | 11870 | 1.1386 | 0.0000 | 0.0000 | 0.0000 |
| UP_SEQ_FEATURE   | zinc finger region:C2H2-type 14                              | 106  | 1.6     | 1.05E-11 | 6533 | 125  | 11760 | 1.5265 | 0.0000 | 0.0000 | 0.0000 |
| UP_KEYWORDS      | Metal-binding                                                | 1517 | 22.8981 | 1.52E-09 | 6594 | 2494 | 11870 | 1.0949 | 0.0000 | 0.0000 | 0.0000 |

|                  |                                               |      |         |          |      |      |       |        |        |        |        |
|------------------|-----------------------------------------------|------|---------|----------|------|------|-------|--------|--------|--------|--------|
| UP_SEQ_FEATURE   | zinc finger region:C2H2-type 16               | 76   | 1.14717 | 8.16E-10 | 6533 | 87   | 11760 | 1.5725 | 0.0000 | 0.0000 | 0.0000 |
| UP_KEYWORDS      | Chromatin regulator                           | 180  | 2.71698 | 2.32E-08 | 6594 | 247  | 11870 | 1.3118 | 0.0000 | 0.0000 | 0.0000 |
| UP_SEQ_FEATURE   | zinc finger region:C2H2-type 15               | 91   | 1.37358 | 4.92E-09 | 6533 | 110  | 11760 | 1.4892 | 0.0001 | 0.0000 | 0.0000 |
| INTERPRO         | IPR013083:Zinc finger,<br>RING/FYVE/PHD-type  | 228  | 3.44151 | 1.95E-08 | 6228 | 322  | 11196 | 1.2729 | 0.0001 | 0.0000 | 0.0000 |
| UP_KEYWORDS      | Ubl conjugation pathway                       | 338  | 5.10189 | 6.34E-07 | 6594 | 511  | 11870 | 1.1907 | 0.0004 | 0.0000 | 0.0009 |
| GOTERM_BP_DIRECT | GO:0010467~gene expression                    | 499  | 7.53208 | 5.21E-08 | 5744 | 773  | 10388 | 1.1675 | 0.0004 | 0.0001 | 0.0001 |
| UP_KEYWORDS      | Chromosome                                    | 171  | 2.58113 | 3.46E-06 | 6594 | 244  | 11870 | 1.2616 | 0.0022 | 0.0002 | 0.0051 |
| GOTERM_CC_DIRECT | GO:0005654~nucleoplasm                        | 1234 | 18.6264 | 5.16E-07 | 6088 | 2048 | 10996 | 1.0883 | 0.0006 | 0.0003 | 0.0008 |
| UP_SEQ_FEATURE   | zinc finger region:C2H2-type 17               | 61   | 0.92075 | 5.35E-07 | 6533 | 72   | 11760 | 1.5251 | 0.0060 | 0.0003 | 0.0011 |
| INTERPRO         | IPR001841:Zinc finger, RING-type              | 155  | 2.33962 | 5.02E-07 | 6228 | 214  | 11196 | 1.3021 | 0.0026 | 0.0004 | 0.0010 |
| SMART            | SM00184:SM00184                               | 152  | 2.29434 | 2.69E-06 | 3429 | 209  | 6011  | 1.2749 | 0.0016 | 0.0005 | 0.0040 |
| UP_KEYWORDS      | RNA-binding                                   | 324  | 4.89057 | 9.92E-06 | 6594 | 498  | 11870 | 1.1712 | 0.0062 | 0.0006 | 0.0147 |
| UP_SEQ_FEATURE   | zinc finger region:C2H2-type 1;<br>degenerate | 72   | 1.08679 | 1.37E-06 | 6533 | 89   | 11760 | 1.4563 | 0.0153 | 0.0008 | 0.0028 |
| GOTERM_MF_DIRECT | GO:0046872~metal ion binding                  | 832  | 12.5585 | 8.87E-07 | 5820 | 1343 | 10423 | 1.1095 | 0.0021 | 0.0011 | 0.0016 |
| GOTERM_MF_DIRECT | GO:0008270~zinc ion binding                   | 502  | 7.57736 | 1.38E-06 | 5820 | 785  | 10423 | 1.1453 | 0.0033 | 0.0011 | 0.0024 |
| GOTERM_BP_DIRECT | GO:0006996~organelle organization             | 175  | 2.64151 | 8.47E-07 | 5744 | 248  | 10388 | 1.2762 | 0.0064 | 0.0016 | 0.0017 |
| KEGG_PATHWAY     | hsa05016:Huntington's disease                 | 97   | 1.46415 | 1.87E-05 | 2257 | 137  | 4284  | 1.3439 | 0.0055 | 0.0027 | 0.0248 |
| KEGG_PATHWAY     | hsa05012:Parkinson's disease                  | 71   | 1.0717  | 9.65E-06 | 2257 | 94   | 4284  | 1.4337 | 0.0028 | 0.0028 | 0.0128 |
| INTERPRO         | IPR013164:Cadherin, N-terminal                | 39   | 0.58868 | 3.94E-06 | 6228 | 43   | 11196 | 1.6305 | 0.0205 | 0.0030 | 0.0075 |
| UP_KEYWORDS      | mRNA processing                               | 171  | 2.58113 | 6.35E-05 | 6594 | 252  | 11870 | 1.2215 | 0.0389 | 0.0030 | 0.0943 |
| UP_SEQ_FEATURE   | zinc finger region:RING-type                  | 105  | 1.58491 | 5.44E-06 | 6533 | 141  | 11760 | 1.3405 | 0.0595 | 0.0031 | 0.0112 |
| UP_KEYWORDS      | mRNA splicing                                 | 139  | 2.09811 | 5.95E-05 | 6594 | 200  | 11870 | 1.2511 | 0.0364 | 0.0031 | 0.0883 |

|                  |                                                   |      |         |          |      |      |       |        |        |        |        |
|------------------|---------------------------------------------------|------|---------|----------|------|------|-------|--------|--------|--------|--------|
| GOTERM_MF_DIRECT | GO:0004842~ubiquitin-protein transferase activity | 159  | 2.4     | 5.32E-06 | 5820 | 225  | 10423 | 1.2656 | 0.0127 | 0.0032 | 0.0093 |
| GOTERM_MF_DIRECT | GO:0016874~ligase activity                        | 144  | 2.17358 | 7.37E-06 | 5820 | 202  | 10423 | 1.2767 | 0.0175 | 0.0035 | 0.0129 |
| GOTERM_MF_DIRECT | GO:0044822~poly(A) RNA binding                    | 582  | 8.78491 | 1.20E-05 | 5820 | 931  | 10423 | 1.1195 | 0.0283 | 0.0048 | 0.0210 |
| KEGG_PATHWAY     | hsa00190:Oxidative phosphorylation                | 61   | 0.92075 | 1.01E-04 | 2257 | 82   | 4284  | 1.4120 | 0.0292 | 0.0074 | 0.1343 |
| UP_KEYWORDS      | Ligase                                            | 200  | 3.01887 | 1.77E-04 | 6594 | 303  | 11870 | 1.1882 | 0.1044 | 0.0078 | 0.2620 |
| UP_KEYWORDS      | Cell cycle                                        | 327  | 4.93585 | 1.95E-04 | 6594 | 516  | 11870 | 1.1408 | 0.1144 | 0.0081 | 0.2887 |
| UP_KEYWORDS      | Helicase                                          | 85   | 1.28302 | 2.08E-04 | 6594 | 117  | 11870 | 1.3078 | 0.1216 | 0.0081 | 0.3082 |
| KEGG_PATHWAY     | hsa05010:Alzheimer's disease                      | 84   | 1.26792 | 8.96E-05 | 2257 | 119  | 4284  | 1.3398 | 0.0260 | 0.0087 | 0.1193 |
| UP_KEYWORDS      | Mental retardation                                | 158  | 2.38491 | 2.47E-04 | 6594 | 235  | 11870 | 1.2103 | 0.1430 | 0.0090 | 0.3665 |
| UP_KEYWORDS      | Ubl conjugation                                   | 788  | 11.8943 | 2.82E-04 | 6594 | 1311 | 11870 | 1.0820 | 0.1613 | 0.0097 | 0.4177 |
| SMART            | SM00249:SM00249                                   | 62   | 0.93585 | 6.76E-05 | 3429 | 78   | 6011  | 1.3934 | 0.0400 | 0.0102 | 0.0998 |
| UP_KEYWORDS      | Cell division                                     | 204  | 3.07925 | 3.34E-04 | 6594 | 312  | 11870 | 1.1770 | 0.1880 | 0.0109 | 0.4943 |
| UP_KEYWORDS      | RNA-mediated gene silencing                       | 31   | 0.46792 | 4.19E-04 | 6594 | 36   | 11870 | 1.5501 | 0.2299 | 0.0130 | 0.6197 |
| UP_KEYWORDS      | Isopeptide bond                                   | 491  | 7.41132 | 4.86E-04 | 6594 | 801  | 11870 | 1.1034 | 0.2617 | 0.0137 | 0.7193 |
| UP_KEYWORDS      | Acetylation                                       | 1628 | 24.5736 | 4.79E-04 | 6594 | 2792 | 11870 | 1.0496 | 0.2582 | 0.0141 | 0.7082 |
| INTERPRO         | IPR001965:Zinc finger, PHD-type                   | 62   | 0.93585 | 2.56E-05 | 6228 | 78   | 11196 | 1.4289 | 0.1261 | 0.0167 | 0.0490 |
| INTERPRO         | IPR019787:Zinc finger, PHD-finger                 | 55   | 0.83019 | 3.40E-05 | 6228 | 68   | 11196 | 1.4540 | 0.1640 | 0.0197 | 0.0651 |
| UP_KEYWORDS      | Kelch repeat                                      | 40   | 0.60377 | 7.99E-04 | 6594 | 50   | 11870 | 1.4401 | 0.3927 | 0.0214 | 1.1796 |
| SMART            | SM00490:SM00490                                   | 69   | 1.04151 | 1.80E-04 | 3429 | 90   | 6011  | 1.3440 | 0.1034 | 0.0216 | 0.2663 |
| UP_SEQ_FEATURE   | domain:Helicase ATP-binding                       | 70   | 1.0566  | 4.60E-05 | 6533 | 91   | 11760 | 1.3847 | 0.4051 | 0.0244 | 0.0950 |
| INTERPRO         | IPR001650:Helicase, C-terminal                    | 70   | 1.0566  | 4.86E-05 | 6228 | 91   | 11196 | 1.3828 | 0.2254 | 0.0252 | 0.0929 |
| GOTERM_BP_DIRECT | GO:0022904~respiratory electron transport chain   | 64   | 0.96604 | 2.00E-05 | 5744 | 81   | 10388 | 1.4289 | 0.1400 | 0.0297 | 0.0398 |
| UP_KEYWORDS      | Centromere                                        | 68   | 1.02642 | 0.00122  | 6594 | 94   | 11870 | 1.3022 | 0.5323 | 0.0312 | 1.7922 |

|                  |                                                            |     |         |          |      |      |       |        |        |        |        |
|------------------|------------------------------------------------------------|-----|---------|----------|------|------|-------|--------|--------|--------|--------|
| SMART            | SM00487:SM00487                                            | 69  | 1.04151 | 3.18E-04 | 3429 | 91   | 6011  | 1.3292 | 0.1751 | 0.0316 | 0.4693 |
| UP_SEQ_FEATURE   | zinc finger region:C2H2-type 19                            | 40  | 0.60377 | 6.73E-05 | 6533 | 47   | 11760 | 1.5320 | 0.5324 | 0.0340 | 0.1390 |
| UP_KEYWORDS      | Ribonucleoprotein                                          | 142 | 2.1434  | 1.60E-03 | 6594 | 215  | 11870 | 1.1889 | 0.6321 | 0.0377 | 2.3513 |
| UP_KEYWORDS      | Nucleotide-binding                                         | 786 | 11.8642 | 0.00159  | 6594 | 1322 | 11870 | 1.0703 | 0.6305 | 0.0390 | 2.3415 |
| UP_SEQ_FEATURE   | domain:Helicase C-terminal                                 | 68  | 1.02642 | 8.74E-05 | 6533 | 89   | 11760 | 1.3754 | 0.6271 | 0.0403 | 0.1804 |
| UP_KEYWORDS      | DNA damage                                                 | 173 | 2.61132 | 0.00179  | 6594 | 267  | 11870 | 1.1664 | 0.6731 | 0.0406 | 2.6252 |
| INTERPRO         | IPR014001:Helicase, superfamily 1/2,<br>ATP-binding domain | 70  | 1.0566  | 8.89E-05 | 6228 | 92   | 11196 | 1.3678 | 0.3737 | 0.0416 | 0.1700 |
| UP_SEQ_FEATURE   | zinc finger region:C2H2-type 18                            | 46  | 0.69434 | 8.73E-05 | 6533 | 56   | 11760 | 1.4786 | 0.6267 | 0.0419 | 0.1802 |
| GOTERM_BP_DIRECT | GO:0000278~mitotic cell cycle                              | 228 | 3.44151 | 4.59E-05 | 5744 | 346  | 10388 | 1.1917 | 0.2922 | 0.0423 | 0.0910 |
| GOTERM_BP_DIRECT | GO:0016567~protein ubiquitination                          | 182 | 2.74717 | 4.43E-05 | 5744 | 270  | 10388 | 1.2191 | 0.2835 | 0.0465 | 0.0878 |
| GOTERM_MF_DIRECT | GO:0003723~RNA binding                                     | 209 | 3.15472 | 1.52E-04 | 5820 | 316  | 10423 | 1.1845 | 0.3054 | 0.0507 | 0.2664 |
| GOTERM_BP_DIRECT | GO:0044237~cellular metabolic process                      | 83  | 1.25283 | 6.51E-05 | 5744 | 112  | 10388 | 1.3402 | 0.3875 | 0.0530 | 0.1291 |
| UP_SEQ_FEATURE   | zinc finger region:C2H2-type 2;<br>degenerate              | 43  | 0.64906 | 1.21E-04 | 6533 | 52   | 11760 | 1.4885 | 0.7442 | 0.0531 | 0.2492 |
| GOTERM_BP_DIRECT | GO:0008380~RNA splicing                                    | 134 | 2.02264 | 4.41E-05 | 5744 | 192  | 10388 | 1.2622 | 0.2825 | 0.0538 | 0.0874 |
| UP_KEYWORDS      | DNA replication                                            | 58  | 0.87547 | 0.00279  | 6594 | 80   | 11870 | 1.3051 | 0.8254 | 0.0584 | 4.0678 |
| UP_KEYWORDS      | DNA repair                                                 | 145 | 2.18868 | 2.75E-03 | 6594 | 222  | 11870 | 1.1758 | 0.8203 | 0.0595 | 4.0027 |
| UP_KEYWORDS      | Mitosis                                                    | 137 | 2.06792 | 0.00298  | 6594 | 209  | 11870 | 1.1800 | 0.8445 | 0.0602 | 4.3319 |
| UP_KEYWORDS      | Spliceosome                                                | 71  | 1.0717  | 0.00313  | 6594 | 101  | 11870 | 1.2654 | 0.8589 | 0.0612 | 4.5526 |
| GOTERM_MF_DIRECT | GO:0000166~nucleotide binding                              | 155 | 2.33962 | 2.38E-04 | 5820 | 229  | 10423 | 1.2122 | 0.4351 | 0.0689 | 0.4171 |
| GOTERM_MF_DIRECT | GO:0061630~ubiquitin protein ligase<br>activity            | 97  | 1.46415 | 2.68E-04 | 5820 | 136  | 10423 | 1.2773 | 0.4745 | 0.0690 | 0.4699 |
| UP_KEYWORDS      | Nucleosome core                                            | 23  | 0.34717 | 0.00448  | 6594 | 27   | 11870 | 1.5334 | 0.9393 | 0.0838 | 6.4509 |
| UP_KEYWORDS      | Respiratory chain                                          | 31  | 0.46792 | 0.00469  | 6594 | 39   | 11870 | 1.4309 | 0.9469 | 0.0851 | 6.7476 |

|                  |                                                                         |     |         |          |      |      |       |        |        |        |        |
|------------------|-------------------------------------------------------------------------|-----|---------|----------|------|------|-------|--------|--------|--------|--------|
| UP_KEYWORDS      | Neurogenesis                                                            | 125 | 1.88679 | 4.98E-03 | 6594 | 191  | 11870 | 1.1781 | 0.9556 | 0.0876 | 7.1450 |
| UP_KEYWORDS      | ATP-binding                                                             | 609 | 9.19245 | 0.00531  | 6594 | 1024 | 11870 | 1.0706 | 0.9639 | 0.0906 | 7.6015 |
| GOTERM_MF_DIRECT | GO:0003700~transcription factor activity, sequence-specific DNA binding | 364 | 5.49434 | 4.05E-04 | 5820 | 580  | 10423 | 1.1239 | 0.6219 | 0.0927 | 0.7093 |
| INTERPRO         | IPR012677:Nucleotide-binding, alpha-beta plait                          | 130 | 1.96226 | 2.33E-04 | 6228 | 189  | 11196 | 1.2365 | 0.7060 | 0.0970 | 0.4442 |

### G3 (Dependent- Independent+)

| Category         | Term                                        | Count | %       | PValue   | List Total | Pop Hits | Pop Total | Fold Enrichment | Bonferroni | Benjamini | FDR    |
|------------------|---------------------------------------------|-------|---------|----------|------------|----------|-----------|-----------------|------------|-----------|--------|
| UP_KEYWORDS      | Secreted                                    | 80    | 15.444  | 1.45E-12 | 517        | 790      | 11870     | 2.3250          | 0.0000     | 0.0000    | 0.0000 |
| UP_KEYWORDS      | Signal                                      | 130   | 25.0965 | 4.92E-11 | 517        | 1706     | 11870     | 1.7495          | 0.0000     | 0.0000    | 0.0000 |
| UP_KEYWORDS      | Disulfide bond                              | 106   | 20.4633 | 4.69E-09 | 517        | 1385     | 11870     | 1.7572          | 0.0000     | 0.0000    | 0.0000 |
| UP_SEQ_FEATURE   | signal peptide                              | 123   | 23.7452 | 4.62E-10 | 516        | 1623     | 11760     | 1.7272          | 0.0000     | 0.0000    | 0.0000 |
| GOTERM_CC_DIRECT | GO:0070062~extracellular exosome            | 133   | 25.6757 | 5.21E-09 | 489        | 1856     | 10996     | 1.6114          | 0.0000     | 0.0000    | 0.0000 |
| GOTERM_CC_DIRECT | GO:0005576~extracellular region             | 57    | 11.0039 | 2.50E-08 | 489        | 580      | 10996     | 2.2099          | 0.0000     | 0.0000    | 0.0000 |
| GOTERM_CC_DIRECT | GO:0005615~extracellular space              | 60    | 11.583  | 6.71E-08 | 489        | 644      | 10996     | 2.0950          | 0.0000     | 0.0000    | 0.0001 |
| UP_SEQ_FEATURE   | disulfide bond                              | 90    | 17.3745 | 2.55E-08 | 516        | 1134     | 11760     | 1.8088          | 0.0000     | 0.0000    | 0.0000 |
| UP_SEQ_FEATURE   | topological domain:Extracellular            | 94    | 18.1467 | 9.18E-08 | 516        | 1237     | 11760     | 1.7319          | 0.0001     | 0.0000    | 0.0002 |
| INTERPRO         | IPR006703:AIG1                              | 7     | 1.35135 | 1.69E-07 | 487        | 8        | 11196     | 20.1160         | 0.0002     | 0.0002    | 0.0003 |
| UP_KEYWORDS      | Glycoprotein                                | 137   | 26.4479 | 2.73E-06 | 517        | 2179     | 11870     | 1.4435          | 0.0010     | 0.0003    | 0.0038 |
| GOTERM_CC_DIRECT | GO:0009897~external side of plasma membrane | 18    | 3.4749  | 3.34E-06 | 489        | 105      | 10996     | 3.8549          | 0.0012     | 0.0003    | 0.0046 |
| GOTERM_CC_DIRECT | GO:0031012~extracellular matrix             | 18    | 3.4749  | 5.64E-06 | 489        | 109      | 10996     | 3.7134          | 0.0019     | 0.0004    | 0.0077 |



|                  |                                                               |     |         |          |     |      |       |        |        |        |        |
|------------------|---------------------------------------------------------------|-----|---------|----------|-----|------|-------|--------|--------|--------|--------|
| UP_SEQ_FEATURE   | topological domain:Cytoplasmic                                | 112 | 21.6216 | 6.57E-06 | 516 | 1705 | 11760 | 1.4971 | 0.0095 | 0.0024 | 0.0109 |
| UP_KEYWORDS      | Cell adhesion                                                 | 32  | 6.17761 | 4.21E-05 | 517 | 329  | 11870 | 2.2331 | 0.0153 | 0.0031 | 0.0579 |
| UP_KEYWORDS      | Cell membrane                                                 | 101 | 19.4981 | 5.32E-05 | 517 | 1582 | 11870 | 1.4658 | 0.0193 | 0.0032 | 0.0733 |
| GOTERM_CC_DIRECT | GO:0005887~integral component of plasma membrane              | 54  | 10.4247 | 5.75E-05 | 489 | 690  | 10996 | 1.7598 | 0.0196 | 0.0033 | 0.0785 |
| UP_SEQ_FEATURE   | glycosylation site:N-linked (GlcNAc...)                       | 126 | 24.3243 | 1.32E-05 | 516 | 2007 | 11760 | 1.4308 | 0.0190 | 0.0038 | 0.0219 |
| UP_KEYWORDS      | Transmembrane                                                 | 161 | 31.0811 | 7.72E-05 | 517 | 2823 | 11870 | 1.3094 | 0.0279 | 0.0040 | 0.1062 |
| UP_KEYWORDS      | Fatty acid metabolism                                         | 14  | 2.7027  | 1.03E-04 | 517 | 88   | 11870 | 3.6526 | 0.0369 | 0.0042 | 0.1413 |
| UP_KEYWORDS      | Transmembrane helix                                           | 160 | 30.888  | 9.58E-05 | 517 | 2814 | 11870 | 1.3054 | 0.0344 | 0.0044 | 0.1317 |
| UP_KEYWORDS      | Cytokine                                                      | 12  | 2.3166  | 1.52E-04 | 517 | 68   | 11870 | 4.0517 | 0.0542 | 0.0056 | 0.2092 |
| UP_KEYWORDS      | Lipid metabolism                                              | 26  | 5.01931 | 2.84E-04 | 517 | 269  | 11870 | 2.2191 | 0.0988 | 0.0094 | 0.3908 |
| KEGG_PATHWAY     | hsa05144:Malaria                                              | 9   | 1.73745 | 4.61E-05 | 225 | 27   | 4284  | 6.3467 | 0.0107 | 0.0107 | 0.0592 |
| UP_KEYWORDS      | Lysosome                                                      | 20  | 3.861   | 4.40E-04 | 517 | 185  | 11870 | 2.4821 | 0.1489 | 0.0123 | 0.6046 |
| UP_KEYWORDS      | Oxidoreductase                                                | 32  | 6.17761 | 4.10E-04 | 517 | 373  | 11870 | 1.9697 | 0.1394 | 0.0124 | 0.5633 |
| GOTERM_BP_DIRECT | GO:0006955~immune response                                    | 20  | 3.861   | 1.39E-05 | 458 | 142  | 10388 | 3.1945 | 0.0300 | 0.0151 | 0.0242 |
| GOTERM_CC_DIRECT | GO:0005886~plasma membrane                                    | 126 | 24.3243 | 4.03E-04 | 489 | 2139 | 10996 | 1.3246 | 0.1298 | 0.0197 | 0.5486 |
| GOTERM_BP_DIRECT | GO:0007155~cell adhesion                                      | 30  | 5.79151 | 9.42E-06 | 458 | 273  | 10388 | 2.4924 | 0.0204 | 0.0204 | 0.0164 |
| SMART            | SM00181:SM00181                                               | 17  | 3.28185 | 1.15E-04 | 244 | 137  | 6011  | 3.0569 | 0.0210 | 0.0210 | 0.1420 |
| BIOCARTA         | h_granulocytesPathway:Adhesion and Diapedesis of Granulocytes | 6   | 1.1583  | 1.75E-04 | 67  | 11   | 1169  | 9.5170 | 0.0213 | 0.0213 | 0.2018 |
| UP_KEYWORDS      | EGF-like domain                                               | 16  | 3.0888  | 0.00112  | 517 | 140  | 11870 | 2.6239 | 0.3354 | 0.0288 | 1.5251 |
| KEGG_PATHWAY     | hsa04060:Cytokine-cytokine receptor interaction               | 15  | 2.89575 | 3.52E-04 | 225 | 95   | 4284  | 3.0063 | 0.0788 | 0.0402 | 0.4515 |
| UP_KEYWORDS      | Immunity                                                      | 20  | 3.861   | 0.00264  | 517 | 215  | 11870 | 2.1358 | 0.6197 | 0.0624 | 3.5718 |
| UP_SEQ_FEATURE   | transmembrane region                                          | 153 | 29.5367 | 3.02E-04 | 516 | 2709 | 11760 | 1.2872 | 0.3554 | 0.0706 | 0.4993 |

|             |                                               |    |        |          |     |     |       |        |        |        |        |
|-------------|-----------------------------------------------|----|--------|----------|-----|-----|-------|--------|--------|--------|--------|
| INTERPRO    | IPR000742:Epidermal growth factor-like domain | 18 | 3.4749 | 1.64E-04 | 487 | 144 | 11196 | 2.8737 | 0.1396 | 0.0724 | 0.2563 |
| UP_KEYWORDS | Deafness                                      | 14 | 2.7027 | 0.00349  | 517 | 127 | 11870 | 2.5310 | 0.7223 | 0.0770 | 4.7055 |
| UP_KEYWORDS | Lectin                                        | 10 | 1.9305 | 0.00422  | 517 | 73  | 11870 | 3.1451 | 0.7870 | 0.0869 | 5.6510 |
| SMART       | SM00060:SM00060                               | 14 | 2.7027 | 0.00151  | 244 | 125 | 6011  | 2.7591 | 0.2440 | 0.0890 | 1.8538 |

**Supplementary Table S2.** Functional enrichment (DAVID) of genes with altered expressions in ASD in their composition-independent components, sorted in ascending order of Benjamini corrected *P* value. Only the functional terms with Benjamini corrected *P*<0.1 are shown.

| Category        | Term                                            | Count | %     | PValue   | List Total | Pop Hits | Pop Total | Fold Enrichment | Bonferroni | Benjamini | FDR    |
|-----------------|-------------------------------------------------|-------|-------|----------|------------|----------|-----------|-----------------|------------|-----------|--------|
| SP_PIR_KEYWORDS | membrane                                        | 279   | 44.71 | 4.09E-13 | 618        | 4176     | 13242     | 1.4316          | 0.0000     | 0.0000    | 0.0000 |
| SP_PIR_KEYWORDS | transmembrane                                   | 216   | 34.62 | 8.86E-11 | 618        | 3133     | 13242     | 1.4773          | 0.0000     | 0.0000    | 0.0000 |
| UP_SEQ_FEATURE  | transmembrane region                            | 216   | 34.62 | 4.46E-11 | 617        | 3115     | 13233     | 1.4872          | 0.0000     | 0.0000    | 0.0000 |
| UP_SEQ_FEATURE  | topological domain:Cytoplasmic                  | 152   | 24.36 | 1.65E-10 | 617        | 1986     | 13233     | 1.6415          | 0.0000     | 0.0000    | 0.0000 |
| SP_PIR_KEYWORDS | glycoprotein                                    | 174   | 27.88 | 5.00E-09 | 618        | 2480     | 13242     | 1.5034          | 0.0000     | 0.0000    | 0.0000 |
| SP_PIR_KEYWORDS | cell junction                                   | 38    | 6.09  | 6.99E-08 | 618        | 302      | 13242     | 2.6961          | 0.0000     | 0.0000    | 0.0001 |
| UP_SEQ_FEATURE  | glycosylation site:N-linked (GlcNAc...)         | 163   | 26.12 | 5.05E-08 | 617        | 2357     | 13233     | 1.4832          | 0.0001     | 0.0000    | 0.0001 |
| UP_SEQ_FEATURE  | topological domain:Extracellular                | 113   | 18.11 | 4.91E-08 | 617        | 1463     | 13233     | 1.6566          | 0.0001     | 0.0000    | 0.0001 |
| GOTERM_CC_FAT   | GO:0031224~intrinsic to membrane                | 240   | 38.46 | 1.02E-07 | 470        | 3478     | 8845      | 1.2986          | 0.0000     | 0.0000    | 0.0001 |
| GOTERM_CC_FAT   | GO:0045202~synapse                              | 38    | 6.09  | 4.71E-07 | 470        | 289      | 8845      | 2.4745          | 0.0002     | 0.0001    | 0.0007 |
| GOTERM_CC_FAT   | GO:0016021~integral to membrane                 | 229   | 36.70 | 6.72E-07 | 470        | 3347     | 8845      | 1.2876          | 0.0003     | 0.0001    | 0.0009 |
| GOTERM_CC_FAT   | GO:0005886~plasma membrane                      | 173   | 27.72 | 3.45E-07 | 470        | 2337     | 8845      | 1.3931          | 0.0001     | 0.0001    | 0.0005 |
| GOTERM_CC_FAT   | GO:0044459~plasma membrane part                 | 120   | 19.23 | 2.87E-06 | 470        | 1522     | 8845      | 1.4838          | 0.0011     | 0.0002    | 0.0040 |
| SP_PIR_KEYWORDS | synapse                                         | 24    | 3.85  | 4.03E-06 | 618        | 170      | 13242     | 3.0250          | 0.0017     | 0.0003    | 0.0057 |
| GOTERM_CC_FAT   | GO:0044456~synapse part                         | 28    | 4.49  | 5.31E-06 | 470        | 198      | 8845      | 2.6613          | 0.0021     | 0.0003    | 0.0074 |
| GOTERM_CC_FAT   | GO:0016023~cytoplasmic membrane-bounded vesicle | 46    | 7.37  | 7.01E-06 | 470        | 428      | 8845      | 2.0226          | 0.0027     | 0.0004    | 0.0097 |
| SP_PIR_KEYWORDS | signal                                          | 127   | 20.35 | 5.58E-06 | 618        | 1860     | 13242     | 1.4630          | 0.0024     | 0.0004    | 0.0079 |
| GOTERM_CC_FAT   | GO:0031988~membrane-bounded vesicle             | 47    | 7.53  | 8.51E-06 | 470        | 445      | 8845      | 1.9876          | 0.0033     | 0.0004    | 0.0118 |
| SP_PIR_KEYWORDS | ion transport                                   | 39    | 6.25  | 1.71E-05 | 618        | 394      | 13242     | 2.1210          | 0.0072     | 0.0010    | 0.0240 |
| UP_SEQ_FEATURE  | signal peptide                                  | 127   | 20.35 | 5.42E-06 | 617        | 1860     | 13233     | 1.4644          | 0.0092     | 0.0018    | 0.0091 |
| GOTERM_CC_FAT   | GO:0030659~cytoplasmic vesicle membrane         | 18    | 2.88  | 4.83E-05 | 470        | 108      | 8845      | 3.1365          | 0.0186     | 0.0021    | 0.0670 |

|                 |                                                                  |    |       |          |     |      |       |        |        |        |        |
|-----------------|------------------------------------------------------------------|----|-------|----------|-----|------|-------|--------|--------|--------|--------|
| GOTERM_CC_FAT   | GO:0012506~vesicle membrane                                      | 19 | 3.04  | 5.62E-05 | 470 | 120  | 8845  | 2.9797 | 0.0216 | 0.0022 | 0.0781 |
| GOTERM_CC_FAT   | GO:0031410~cytoplasmic vesicle                                   | 48 | 7.69  | 9.59E-05 | 470 | 504  | 8845  | 1.7923 | 0.0365 | 0.0034 | 0.1331 |
| SP_PIR_KEYWORDS | Immunoglobulin domain                                            | 28 | 4.49  | 6.74E-05 | 618 | 257  | 13242 | 2.3345 | 0.0282 | 0.0036 | 0.0948 |
| GOTERM_CC_FAT   | GO:0031982~vesicle                                               | 49 | 7.85  | 1.58E-04 | 470 | 529  | 8845  | 1.7432 | 0.0593 | 0.0044 | 0.2186 |
| GOTERM_CC_FAT   | GO:0008021~synaptic vesicle                                      | 13 | 2.08  | 1.54E-04 | 470 | 66   | 8845  | 3.7068 | 0.0580 | 0.0046 | 0.2134 |
| SP_PIR_KEYWORDS | voltage-gated channel                                            | 15 | 2.40  | 1.08E-04 | 618 | 94   | 13242 | 3.4192 | 0.0450 | 0.0046 | 0.1525 |
| SP_PIR_KEYWORDS | disulfide bond                                                   | 99 | 15.87 | 9.91E-05 | 618 | 1456 | 13242 | 1.4569 | 0.0411 | 0.0047 | 0.1393 |
| SP_PIR_KEYWORDS | transport                                                        | 90 | 14.42 | 1.22E-04 | 618 | 1301 | 13242 | 1.4823 | 0.0502 | 0.0047 | 0.1708 |
| GOTERM_CC_FAT   | GO:0005887~integral to plasma membrane                           | 65 | 10.42 | 1.47E-04 | 470 | 767  | 8845  | 1.5948 | 0.0553 | 0.0047 | 0.2033 |
| SP_PIR_KEYWORDS | ionic channel                                                    | 23 | 3.69  | 1.73E-04 | 618 | 201  | 13242 | 2.4519 | 0.0708 | 0.0061 | 0.2434 |
| GOTERM_CC_FAT   | GO:0030136~clathrin-coated vesicle                               | 17 | 2.72  | 2.57E-04 | 470 | 112  | 8845  | 2.8565 | 0.0951 | 0.0066 | 0.3569 |
| GOTERM_CC_FAT   | GO:0031226~intrinsic to plasma membrane                          | 65 | 10.42 | 2.82E-04 | 470 | 785  | 8845  | 1.5583 | 0.1037 | 0.0068 | 0.3912 |
| GOTERM_CC_FAT   | GO:0030135~coated vesicle                                        | 19 | 3.04  | 3.45E-04 | 470 | 138  | 8845  | 2.5910 | 0.1253 | 0.0078 | 0.4781 |
| GOTERM_CC_FAT   | GO:0030054~cell junction                                         | 38 | 6.09  | 4.51E-04 | 470 | 393  | 8845  | 1.8197 | 0.1605 | 0.0097 | 0.6243 |
| GOTERM_CC_FAT   | GO:0044433~cytoplasmic vesicle part                              | 19 | 3.04  | 4.91E-04 | 470 | 142  | 8845  | 2.5181 | 0.1734 | 0.0100 | 0.6794 |
| GOTERM_CC_FAT   | GO:0030662~coated vesicle membrane                               | 12 | 1.92  | 5.49E-04 | 470 | 65   | 8845  | 3.4743 | 0.1919 | 0.0106 | 0.7597 |
| GOTERM_CC_FAT   | GO:0030665~clathrin coated vesicle membrane                      | 10 | 1.60  | 5.83E-04 | 470 | 46   | 8845  | 4.0911 | 0.2025 | 0.0107 | 0.8067 |
| GOTERM_BP_FAT   | GO:0006812~cation transport                                      | 40 | 6.41  | 1.76E-05 | 466 | 397  | 9616  | 2.0791 | 0.0389 | 0.0131 | 0.0307 |
| GOTERM_BP_FAT   | GO:0019226~transmission of nerve impulse                         | 31 | 4.97  | 2.97E-05 | 466 | 278  | 9616  | 2.3010 | 0.0647 | 0.0133 | 0.0517 |
| GOTERM_BP_FAT   | GO:0000904~cell morphogenesis involved in differentiation        | 25 | 4.01  | 2.44E-05 | 466 | 196  | 9616  | 2.6320 | 0.0535 | 0.0137 | 0.0425 |
| GOTERM_BP_FAT   | GO:0006811~ion transport                                         | 50 | 8.01  | 1.31E-05 | 466 | 540  | 9616  | 1.9107 | 0.0291 | 0.0146 | 0.0228 |
| GOTERM_BP_FAT   | GO:0007268~synaptic transmission                                 | 27 | 4.33  | 5.33E-05 | 466 | 232  | 9616  | 2.4015 | 0.1132 | 0.0149 | 0.0928 |
| GOTERM_BP_FAT   | GO:0048667~cell morphogenesis involved in neuron differentiation | 22 | 3.53  | 5.28E-05 | 466 | 167  | 9616  | 2.7184 | 0.1122 | 0.0169 | 0.0920 |
| UP_SEQ_FEATURE  | disulfide bond                                                   | 96 | 15.38 | 6.43E-05 | 617 | 1387 | 13233 | 1.4845 | 0.1039 | 0.0181 | 0.1085 |

|                 |                                                       |    |       |          |     |      |       |        |        |        |        |
|-----------------|-------------------------------------------------------|----|-------|----------|-----|------|-------|--------|--------|--------|--------|
| GOTERM_BP_FAT   | GO:0030001~metal ion transport                        | 36 | 5.77  | 8.22E-06 | 466 | 328  | 9616  | 2.2648 | 0.0184 | 0.0184 | 0.0143 |
| GOTERM_BP_FAT   | GO:0006816~calcium ion transport                      | 16 | 2.56  | 7.48E-05 | 466 | 99   | 9616  | 3.3350 | 0.1553 | 0.0186 | 0.1304 |
| GOTERM_BP_FAT   | GO:0031175~neuron projection development              | 25 | 4.01  | 5.11E-05 | 466 | 205  | 9616  | 2.5165 | 0.1087 | 0.0190 | 0.0890 |
| GOTERM_BP_FAT   | GO:0048812~neuron projection morphogenesis            | 22 | 3.53  | 8.87E-05 | 466 | 173  | 9616  | 2.6241 | 0.1813 | 0.0198 | 0.1545 |
| SP_PIR_KEYWORDS | cell membrane                                         | 80 | 12.82 | 6.21E-04 | 618 | 1182 | 13242 | 1.4502 | 0.2315 | 0.0201 | 0.8697 |
| GOTERM_BP_FAT   | GO:0030182~neuron differentiation                     | 32 | 5.13  | 1.34E-04 | 466 | 316  | 9616  | 2.0896 | 0.2609 | 0.0249 | 0.2334 |
| GOTERM_BP_FAT   | GO:0048666~neuron development                         | 28 | 4.49  | 1.25E-04 | 466 | 258  | 9616  | 2.2395 | 0.2457 | 0.0253 | 0.2177 |
| SP_PIR_KEYWORDS | cell adhesion                                         | 28 | 4.49  | 8.70E-04 | 618 | 301  | 13242 | 1.9932 | 0.3086 | 0.0260 | 1.2167 |
| GOTERM_BP_FAT   | GO:0007409~axonogenesis                               | 20 | 3.21  | 1.67E-04 | 466 | 155  | 9616  | 2.6626 | 0.3144 | 0.0286 | 0.2914 |
| GOTERM_BP_FAT   | GO:0050877~neurological system process                | 48 | 7.69  | 2.16E-04 | 466 | 571  | 9616  | 1.7347 | 0.3861 | 0.0342 | 0.3765 |
| SP_PIR_KEYWORDS | calcium                                               | 42 | 6.73  | 0.00129  | 618 | 538  | 13242 | 1.6728 | 0.4225 | 0.0359 | 1.8048 |
| GOTERM_BP_FAT   | GO:0015674~di-, tri-valent inorganic cation transport | 17 | 2.72  | 3.01E-04 | 466 | 124  | 9616  | 2.8290 | 0.4924 | 0.0442 | 0.5229 |
| GOTERM_BP_FAT   | GO:0016337~cell-cell adhesion                         | 21 | 3.37  | 4.60E-04 | 466 | 181  | 9616  | 2.3941 | 0.6458 | 0.0628 | 0.7992 |
| GOTERM_CC_FAT   | GO:0012505~endomembrane system                        | 52 | 8.33  | 0.00368  | 470 | 659  | 8845  | 1.4850 | 0.7608 | 0.0630 | 4.9906 |
| GOTERM_CC_FAT   | GO:0030672~synaptic vesicle membrane                  | 6  | 0.96  | 0.00411  | 470 | 21   | 8845  | 5.3769 | 0.7981 | 0.0672 | 5.5650 |
| GOTERM_BP_FAT   | GO:0032990~cell part morphogenesis                    | 23 | 3.69  | 5.47E-04 | 466 | 211  | 9616  | 2.2493 | 0.7090 | 0.0700 | 0.9499 |
| GOTERM_MF_FAT   | GO:0022843~voltage-gated cation channel activity      | 15 | 2.40  | 5.11E-04 | 441 | 106  | 9174  | 2.9438 | 0.3119 | 0.0720 | 0.7726 |
| SP_PIR_KEYWORDS | transmembrane protein                                 | 31 | 4.97  | 0.00291  | 618 | 376  | 13242 | 1.7666 | 0.7095 | 0.0744 | 4.0184 |
| GOTERM_BP_FAT   | GO:0000902~cell morphogenesis                         | 28 | 4.49  | 6.27E-04 | 466 | 285  | 9616  | 2.0273 | 0.7569 | 0.0756 | 1.0873 |
| GOTERM_BP_FAT   | GO:0048858~cell projection morphogenesis              | 22 | 3.53  | 6.63E-04 | 466 | 200  | 9616  | 2.2699 | 0.7757 | 0.0757 | 1.1491 |
| GOTERM_BP_FAT   | GO:0007157~heterophilic cell adhesion                 | 6  | 0.96  | 7.25E-04 | 466 | 16   | 9616  | 7.7382 | 0.8051 | 0.0785 | 1.2565 |
| GOTERM_BP_FAT   | GO:0007155~cell adhesion                              | 41 | 6.57  | 8.41E-04 | 466 | 493  | 9616  | 1.7161 | 0.8501 | 0.0792 | 1.4565 |
| GOTERM_BP_FAT   | GO:0022610~biological adhesion                        | 41 | 6.57  | 8.86E-04 | 466 | 494  | 9616  | 1.7126 | 0.8644 | 0.0799 | 1.5332 |
| GOTERM_BP_FAT   | GO:0007267~cell-cell signaling                        | 35 | 5.61  | 7.85E-04 | 466 | 396  | 9616  | 1.8238 | 0.8298 | 0.0809 | 1.3598 |
| GOTERM_BP_FAT   | GO:0007156~homophilic cell adhesion                   | 13 | 2.08  | 8.31E-04 | 466 | 86   | 9616  | 3.1193 | 0.8467 | 0.0817 | 1.4396 |

|               |                                                         |    |      |          |     |     |       |         |        |        |        |
|---------------|---------------------------------------------------------|----|------|----------|-----|-----|-------|---------|--------|--------|--------|
| GOTERM_MF_FAT | GO:0031420~alkali metal ion binding                     | 19 | 3.04 | 5.08E-04 | 441 | 157 | 9174  | 2.5175  | 0.3102 | 0.0887 | 0.7676 |
| GOTERM_MF_FAT | GO:0005509~calcium ion binding                          | 50 | 8.01 | 3.83E-04 | 441 | 624 | 9174  | 1.6669  | 0.2440 | 0.0890 | 0.5787 |
| GOTERM_MF_FAT | GO:0046873~metal ion transmembrane transporter activity | 25 | 4.01 | 1.36E-04 | 441 | 220 | 9174  | 2.3639  | 0.0949 | 0.0949 | 0.2067 |
| INTERPRO      | IPR002473:Small chemokine, C-X-C/Interleukin 8          | 5  | 0.80 | 2.89E-04 | 555 | 8   | 11800 | 13.2883 | 0.2611 | 0.0959 | 0.4586 |

**Supplementary Dataset S1.** The CIBERSORT-selected markers used in CIBERSORT and QP algorithms, and the cell type signature genes of the eight main cell types in human brains used in DR algorithms.

**Supplementary Dataset S2.** ANCOVA results indicating age-related changes in postnatal human brains in composition-dependent or composition-independent components.

**Supplementary Dataset S3.** ANCOVA results indicating ASD alteration in composition-dependent or composition-independent components.
